# Supplementary material for: Cytotoxic and Anti-Inflammatory Eunicellin-Based Diterpenoids from the Soft Coral Cladiella krempfi
Source: MDPI journal article supplement (doi:10.3390/md11030788), 2013-03-12
Supplement: s1 [file s1]

marinedrugs-11-00788-s001.mol
  corina  04161405073D 1   1.00000     0.00000 
CORINA 3.49 0023  12.04.2013
 38 40  0  0  0  0  0  0  0  0999 V2000
   -0.1057    0.9663    0.0459 C   0  0  0  0  0  0  0  0  0  0  0  0
    0.5226    2.8316   -0.9794 C   0  0  0  0  0  0  0  0  0  0  0  0
    0.1446    1.6910   -2.0583 C   0  0  0  0  0  0  0  0  0  0  0  0
    1.2984    0.7382   -1.5596 C   0  0  0  0  0  0  0  0  0  0  0  0
    2.0527    0.1152   -2.8330 C   0  0  0  0  0  0  0  0  0  0  0  0
    1.0988   -1.1034   -2.6396 C   0  0  0  0  0  0  0  0  0  0  0  0
    0.8187   -1.1375   -1.1556 C   0  0  0  0  0  0  0  0  0  0  0  0
   -0.1821   -0.5423   -0.2296 C   0  0  0  0  0  0  0  0  0  0  0  0
    1.0164    1.8413    0.0270 O   0  0  0  0  0  0  0  0  0  0  0  0
   -1.3434    1.8240    0.1419 C   0  0  0  0  0  0  0  0  0  0  0  0
   -0.8249    3.1863   -0.3190 C   0  0  0  0  0  0  0  0  0  0  0  0
   -1.9986    1.8479    1.5000 C   0  0  0  0  0  0  0  0  0  0  0  0
   -1.4356    2.6983    2.6106 C   0  0  0  0  0  0  0  0  0  0  0  0
   -1.3548    4.1107    2.0172 C   0  0  0  0  0  0  0  0  0  0  0  0
   -0.3684    4.0612    0.8587 C   0  0  0  0  0  0  0  0  0  0  0  0
   -3.0775    1.1244    1.7152 C   0  0  0  0  0  0  0  0  0  0  0  0
    1.6305   -1.9812   -0.5171 C   0  0  0  0  0  0  0  0  0  0  0  0
   -0.0484   -1.2055    1.0310 O   0  0  0  0  0  0  0  0  0  0  0  0
   -0.0490    0.8403    1.1253 H   0  0  0  0  0  0  0  0  0  0  0  0
   -2.1579    1.4704   -0.5284 H   0  0  0  0  0  0  0  0  0  0  0  0
   -1.5200    3.7286   -0.9843 H   0  0  0  0  0  0  0  0  0  0  0  0
    1.1951    3.6396   -1.3121 H   0  0  0  0  0  0  0  0  0  0  0  0
    0.4505    2.3090   -3.4545 C   0  0  0  0  0  0  0  0  0  0  0  0
   -0.1250    5.4843    0.3474 C   0  0  0  0  0  0  0  0  0  0  0  0
    0.5769    6.3032    1.4326 C   0  0  0  0  0  0  0  0  0  0  0  0
    0.9187    7.6124    0.9060 O   0  0  0  0  0  0  0  0  0  0  0  0
    1.5446    8.4595    1.7381 C   0  0  0  0  0  0  0  0  0  0  0  0
    1.9307    9.8362    1.2618 C   0  0  0  0  0  0  0  0  0  0  0  0
   -1.4645    6.1380    0.0016 C   0  0  0  0  0  0  0  0  0  0  0  0
    1.7985    8.1183    2.8690 O   0  0  0  0  0  0  0  0  0  0  0  0
   -0.1021   -0.9598   -3.3992 O   0  0  0  0  0  0  0  0  0  0  0  0
   -1.1614    1.1297   -2.1139 O   0  0  0  0  0  0  0  0  0  0  0  0
   -2.1579    1.9420   -2.4996 C   0  0  0  0  0  0  0  0  0  0  0  0
   -3.5827    1.4518   -2.4732 C   0  0  0  0  0  0  0  0  0  0  0  0
   -4.4999    2.5172   -3.0770 C   0  0  0  0  0  0  0  0  0  0  0  0
   -5.9574    2.0722   -2.9407 C   0  0  0  0  0  0  0  0  0  0  0  0
   -1.9126    3.0663   -2.8680 O   0  0  0  0  0  0  0  0  0  0  0  0
    0.5833    3.6604    1.2255 H   0  0  0  0  0  0  0  0  0  0  0  0
  2  3  1  0      
  3  4  1  0      
  4  5  1  0      
  5  6  1  0      
  6  7  1  0      
  7  8  1  0      
  8  1  1  0      
  1  9  1  0      
  2  9  1  0      
 10 11  1  0      
  1 10  1  0      
  2 11  1  0      
 10 12  1  0      
 12 13  1  0      
 13 14  1  0      
 14 15  1  0      
 15 11  1  0      
 12 16  2  0      
  7 17  2  0      
  8 18  1  0      
  1 19  1  0      
 10 20  1  0      
 11 21  1  0      
  2 22  1  0      
  3 23  1  0      
 15 24  1  0      
 24 25  1  0      
 25 26  1  0      
 26 27  1  0      
 27 28  1  0      
 24 29  1  0      
 27 30  2  0      
  6 31  1  0      
  3 32  1  0      
 32 33  1  0      
 33 34  1  0      
 34 35  1  0      
 35 36  1  0      
 33 37  2  0      
 15 38  1  0      
M  END
$$$$
