# Supplementary material for: Cytotoxic and Anti-Inflammatory Eunicellin-Based Diterpenoids from the Soft Coral Cladiella krempfi
Source: MDPI journal article supplement (doi:10.3390/md11030788), 2013-03-12
Supplement: s2 [file s2]

marinedrugs-11-00788-s001.mol
  ChemDraw03251423462D

 38 40  0  0  0  0  0  0  0  0999 V2000
   -0.9001    1.6921    0.0000 C   0  0  0  0  0  0  0  0  0  0  0  0
   -0.9001    0.6402    0.0000 C   0  0  0  0  0  0  0  0  0  0  0  0
   -0.3226    0.1806    0.0000 C   0  0  0  0  0  0  0  0  0  0  0  0
    0.5024    0.1806    0.0000 C   0  0  0  0  0  0  0  0  0  0  0  0
    1.0799    0.6608    0.0000 C   0  0  0  0  0  0  0  0  0  0  0  0
    1.0799    1.5889    0.0000 C   0  0  0  0  0  0  0  0  0  0  0  0
    0.5024    2.1723    0.0000 C   0  0  0  0  0  0  0  0  0  0  0  0
   -0.3226    2.1723    0.0000 C   0  0  0  0  0  0  0  0  0  0  0  0
   -0.5288    1.1558    0.0000 O   0  0  0  0  0  0  0  0  0  0  0  0
   -1.5188    1.5683    0.0000 C   0  0  0  0  0  0  0  0  0  0  0  0
   -1.5188    0.7433    0.0000 C   0  0  0  0  0  0  0  0  0  0  0  0
   -2.2333    1.9808    0.0000 C   0  0  0  0  0  0  0  0  0  0  0  0
   -2.9478    1.5683    0.0000 C   0  0  0  0  0  0  0  0  0  0  0  0
   -2.9478    0.7433    0.0000 C   0  0  0  0  0  0  0  0  0  0  0  0
   -2.2333    0.3308    0.0000 C   0  0  0  0  0  0  0  0  0  0  0  0
   -2.2333    2.8058    0.0000 C   0  0  0  0  0  0  0  0  0  0  0  0
    0.7159    2.9692    0.0000 C   0  0  0  0  0  0  0  0  0  0  0  0
   -0.5361    2.9692    0.0000 O   0  0  0  0  0  0  0  0  0  0  0  0
   -1.3126    2.4065    0.0000 H   0  0  0  0  0  0  0  0  0  0  0  0
   -1.5188    2.3933    0.0000 H   0  0  0  0  0  0  0  0  0  0  0  0
   -1.5188   -0.0817    0.0000 H   0  0  0  0  0  0  0  0  0  0  0  0
   -1.1136   -0.1567    0.0000 H   0  0  0  0  0  0  0  0  0  0  0  0
   -0.7351   -0.5339    0.0000 C   0  0  0  0  0  0  0  0  0  0  0  0
   -2.2333   -0.4942    0.0000 C   0  0  0  0  0  0  0  0  0  0  0  0
   -2.9478   -0.9067    0.0000 C   0  0  0  0  0  0  0  0  0  0  0  0
   -2.9478   -1.7317    0.0000 O   0  0  0  0  0  0  0  0  0  0  0  0
   -2.2333   -2.1442    0.0000 C   0  0  0  0  0  0  0  0  0  0  0  0
   -1.5188   -1.7317    0.0000 C   0  0  0  0  0  0  0  0  0  0  0  0
   -1.6500   -1.0776    0.0000 C   0  0  0  0  0  0  0  0  0  0  0  0
   -2.2333   -2.9692    0.0000 O   0  0  0  0  0  0  0  0  0  0  0  0
    1.7944    2.0014    0.0000 O   0  0  0  0  0  0  0  0  0  0  0  0
    0.0899   -0.5339    0.0000 O   0  0  0  0  0  0  0  0  0  0  0  0
    0.8044   -0.9464    0.0000 C   0  0  0  0  0  0  0  0  0  0  0  0
    1.5188   -0.5339    0.0000 C   0  0  0  0  0  0  0  0  0  0  0  0
    2.2333   -0.9464    0.0000 C   0  0  0  0  0  0  0  0  0  0  0  0
    2.9478   -0.5339    0.0000 C   0  0  0  0  0  0  0  0  0  0  0  0
    0.8044   -1.7714    0.0000 O   0  0  0  0  0  0  0  0  0  0  0  0
   -2.8167   -0.2526    0.0000 H   0  0  0  0  0  0  0  0  0  0  0  0
  2  3  1  0      
  3  4  1  0      
  4  5  1  0      
  5  6  1  0      
  6  7  1  0      
  7  8  1  0      
  8  1  1  0      
  1  9  1  0      
  2  9  1  0      
 10 11  1  0      
  1 10  1  0      
  2 11  1  0      
 10 12  1  0      
 12 13  1  0      
 13 14  1  0      
 14 15  1  0      
 15 11  1  0      
 12 16  2  0      
  7 17  2  0      
  8 18  1  6      
  1 19  1  6      
 10 20  1  1      
 11 21  1  1      
  2 22  1  6      
  3 23  1  6      
 15 24  1  0      
 24 25  1  0      
 25 26  1  0      
 26 27  1  0      
 27 28  1  0      
 24 29  1  1      
 27 30  2  0      
  6 31  1  1      
  3 32  1  0      
 32 33  1  0      
 33 34  1  0      
 34 35  1  0      
 35 36  1  0      
 33 37  2  0      
 15 38  1  6      
M  END
