# Supplementary material
Source: MDPI journal article supplement (https://www.mdpi.com/1660-3397/11/3/788)
Supplement: s4 [file s4]

marinedrugs-11-00788-s002.mol
  ChemDraw03251423472D

 35 37  0  0  0  0  0  0  0  0999 V2000
    0.7484    0.6608    0.0000 C   0  0  0  0  0  0  0  0  0  0  0  0
    0.7484   -0.3911    0.0000 C   0  0  0  0  0  0  0  0  0  0  0  0
    1.3259   -0.8507    0.0000 C   0  0  0  0  0  0  0  0  0  0  0  0
    2.1509   -0.8507    0.0000 C   0  0  0  0  0  0  0  0  0  0  0  0
    2.7284   -0.3704    0.0000 C   0  0  0  0  0  0  0  0  0  0  0  0
    2.7284    0.5577    0.0000 C   0  0  0  0  0  0  0  0  0  0  0  0
    2.1509    1.1410    0.0000 C   0  0  0  0  0  0  0  0  0  0  0  0
    1.3259    1.1410    0.0000 C   0  0  0  0  0  0  0  0  0  0  0  0
    1.1197    0.1246    0.0000 O   0  0  0  0  0  0  0  0  0  0  0  0
    0.1297    0.5371    0.0000 C   0  0  0  0  0  0  0  0  0  0  0  0
    0.1297   -0.2879    0.0000 C   0  0  0  0  0  0  0  0  0  0  0  0
   -0.5848    0.9496    0.0000 C   0  0  0  0  0  0  0  0  0  0  0  0
   -1.2993    0.5371    0.0000 C   0  0  0  0  0  0  0  0  0  0  0  0
   -1.2993   -0.2879    0.0000 C   0  0  0  0  0  0  0  0  0  0  0  0
   -0.5848   -0.7004    0.0000 C   0  0  0  0  0  0  0  0  0  0  0  0
   -0.5848    1.7746    0.0000 C   0  0  0  0  0  0  0  0  0  0  0  0
    1.1124    1.9379    0.0000 H   0  0  0  0  0  0  0  0  0  0  0  0
    0.3359    1.3753    0.0000 H   0  0  0  0  0  0  0  0  0  0  0  0
    0.1297    1.3621    0.0000 H   0  0  0  0  0  0  0  0  0  0  0  0
    0.1297   -1.1129    0.0000 H   0  0  0  0  0  0  0  0  0  0  0  0
    0.5349   -1.1880    0.0000 H   0  0  0  0  0  0  0  0  0  0  0  0
    0.9134   -1.5651    0.0000 C   0  0  0  0  0  0  0  0  0  0  0  0
   -0.5848   -1.5254    0.0000 C   0  0  0  0  0  0  0  0  0  0  0  0
   -1.2993   -1.9379    0.0000 C   0  0  0  0  0  0  0  0  0  0  0  0
    3.4429    0.9702    0.0000 O   0  0  0  0  0  0  0  0  0  0  0  0
    0.1297   -1.9379    0.0000 C   0  0  0  0  0  0  0  0  0  0  0  0
    2.5634    1.8555    0.0000 C   0  0  0  0  0  0  0  0  0  0  0  0
    1.1749   -1.4130    0.0000 O   0  0  0  0  0  0  0  0  0  0  0  0
    0.4605   -0.1755    0.0000 O   0  0  0  0  0  0  0  0  0  0  0  0
    0.4605   -1.0005    0.0000 C   0  0  0  0  0  0  0  0  0  0  0  0
   -0.2540   -1.4130    0.0000 C   0  0  0  0  0  0  0  0  0  0  0  0
   -2.0140    0.5371    0.0000 O   0  0  0  0  0  0  0  0  0  0  0  0
   -2.7284    1.7746    0.0000 O   0  0  0  0  0  0  0  0  0  0  0  0
   -2.7284    0.9496    0.0000 C   0  0  0  0  0  0  0  0  0  0  0  0
   -3.4429    0.5371    0.0000 C   0  0  0  0  0  0  0  0  0  0  0  0
  2  3  1  0      
  3  4  1  0      
  4  5  1  0      
  5  6  1  0      
  6  7  1  0      
  7  8  1  0      
  8  1  1  0      
  1  9  1  0      
  2  9  1  0      
 10 11  1  0      
  1 10  1  0      
  2 11  1  0      
 10 12  1  0      
 12 13  1  0      
 13 14  1  0      
 14 15  1  0      
 15 11  1  0      
 12 16  2  0      
  8 17  1  6      
  1 18  1  6      
 10 19  1  1      
 11 20  1  1      
  2 21  1  6      
  3 22  1  6      
 23 24  1  0      
 23 26  1  0      
 15 23  1  1      
  6 25  2  0      
  7 27  1  1      
  3 28  1  0      
 28 30  1  0      
 29 30  2  0      
 30 31  1  0      
 13 32  1  6      
 32 34  1  0      
 33 34  2  0      
 34 35  1  0      
M  STY  1   1 SUP
M  SLB  1   1   1
M  SAL   1  4  28  29  30  31
M  SBL   1  1  30
M  SMT   1 OAc
M  SBV   1 30   -6.3944    4.6154
M  STY  1   2 SUP
M  SLB  1   2   2
M  SAL   2  4  32  33  34  35
M  SBL   2  1  34
M  SMT   2 OAc
M  SBV   2 34   -6.9581    5.1777
M  END
