# Supplementary material
Source: MDPI journal article supplement (https://www.mdpi.com/1660-3397/11/3/788)
Supplement: s6 [file s6]

marinedrugs-11-00788-s003.mol
  ChemDraw03251423472D

 34 36  0  0  0  0  0  0  0  0999 V2000
    0.7484    0.7425    0.0000 C   0  0  0  0  0  0  0  0  0  0  0  0
    0.7484   -0.3094    0.0000 C   0  0  0  0  0  0  0  0  0  0  0  0
    1.3259   -0.7690    0.0000 C   0  0  0  0  0  0  0  0  0  0  0  0
    2.1509   -0.7690    0.0000 C   0  0  0  0  0  0  0  0  0  0  0  0
    2.7284   -0.2888    0.0000 C   0  0  0  0  0  0  0  0  0  0  0  0
    2.7284    0.6394    0.0000 C   0  0  0  0  0  0  0  0  0  0  0  0
    2.1509    1.2227    0.0000 C   0  0  0  0  0  0  0  0  0  0  0  0
    1.3259    1.2227    0.0000 C   0  0  0  0  0  0  0  0  0  0  0  0
    1.1197    0.2062    0.0000 O   0  0  0  0  0  0  0  0  0  0  0  0
    0.1297    0.6188    0.0000 C   0  0  0  0  0  0  0  0  0  0  0  0
    0.1297   -0.2062    0.0000 C   0  0  0  0  0  0  0  0  0  0  0  0
   -0.5848    1.0313    0.0000 C   0  0  0  0  0  0  0  0  0  0  0  0
   -1.2993    0.6188    0.0000 C   0  0  0  0  0  0  0  0  0  0  0  0
   -1.2993   -0.2062    0.0000 C   0  0  0  0  0  0  0  0  0  0  0  0
   -0.5848   -0.6188    0.0000 C   0  0  0  0  0  0  0  0  0  0  0  0
   -0.5848    1.8563    0.0000 C   0  0  0  0  0  0  0  0  0  0  0  0
    0.3359    1.4570    0.0000 H   0  0  0  0  0  0  0  0  0  0  0  0
    0.1297    1.4438    0.0000 H   0  0  0  0  0  0  0  0  0  0  0  0
    0.1297   -1.0313    0.0000 H   0  0  0  0  0  0  0  0  0  0  0  0
    0.5349   -1.1063    0.0000 H   0  0  0  0  0  0  0  0  0  0  0  0
    0.9134   -1.4835    0.0000 C   0  0  0  0  0  0  0  0  0  0  0  0
   -0.5848   -1.4438    0.0000 C   0  0  0  0  0  0  0  0  0  0  0  0
   -1.2993   -1.8563    0.0000 C   0  0  0  0  0  0  0  0  0  0  0  0
    3.4429    1.0519    0.0000 O   0  0  0  0  0  0  0  0  0  0  0  0
    0.1297   -1.8563    0.0000 C   0  0  0  0  0  0  0  0  0  0  0  0
    2.7343    1.8061    0.0000 C   0  0  0  0  0  0  0  0  0  0  0  0
   -2.0140    0.6188    0.0000 O   0  0  0  0  0  0  0  0  0  0  0  0
   -2.7284    1.8563    0.0000 O   0  0  0  0  0  0  0  0  0  0  0  0
   -2.7284    1.0313    0.0000 C   0  0  0  0  0  0  0  0  0  0  0  0
   -3.4429    0.6188    0.0000 C   0  0  0  0  0  0  0  0  0  0  0  0
    1.1749   -1.3313    0.0000 O   0  0  0  0  0  0  0  0  0  0  0  0
    0.4605   -0.0938    0.0000 O   0  0  0  0  0  0  0  0  0  0  0  0
    0.4605   -0.9188    0.0000 C   0  0  0  0  0  0  0  0  0  0  0  0
   -0.2540   -1.3313    0.0000 C   0  0  0  0  0  0  0  0  0  0  0  0
  2  3  1  0      
  3  4  1  0      
  4  5  1  0      
  5  6  1  0      
  6  7  1  0      
  7  8  1  0      
  8  1  1  0      
  1  9  1  0      
  2  9  1  0      
 10 11  1  0      
  1 10  1  0      
  2 11  1  0      
 10 12  1  0      
 12 13  1  0      
 13 14  1  0      
 14 15  1  0      
 15 11  1  0      
 12 16  2  0      
  1 17  1  6      
 10 18  1  1      
 11 19  1  1      
  2 20  1  6      
  3 21  1  6      
 22 23  1  0      
 22 25  1  0      
 15 22  1  1      
  6 24  2  0      
  7 26  1  6      
 13 27  1  6      
 27 29  1  0      
 28 29  2  0      
 29 30  1  0      
  3 31  1  0      
 31 33  1  0      
 32 33  2  0      
 33 34  1  0      
M  STY  1   1 SUP
M  SLB  1   1   1
M  SAL   1  4  27  28  29  30
M  SBL   1  1  29
M  SMT   1 OAc
M  SBV   1 29   -7.7213    5.3213
M  STY  1   2 SUP
M  SLB  1   2   2
M  SAL   2  4  31  32  33  34
M  SBL   2  1  33
M  SMT   2 OAc
M  SBV   2 33   -7.1576    4.7590
M  END
