# Supplementary material for: Cytotoxic and Anti-Inflammatory Eunicellin-Based Diterpenoids from the Soft Coral Cladiella krempfi
Source: MDPI journal article supplement (doi:10.3390/md11030788), 2013-03-12
Supplement: s7 [file s7]

marinedrugs-11-00788-s004.mol
  corina  04161405073D 1   1.00000     0.00000 
CORINA 3.49 0023  12.04.2013
 42 44  0  0  0  0  0  0  0  0999 V2000
    0.0105    1.8352    0.0355 C   0  0  0  0  0  0  0  0  0  0  0  0
    1.7193    2.9879   -1.1306 C   0  0  0  0  0  0  0  0  0  0  0  0
    1.0213    2.3436   -2.4232 C   0  0  0  0  0  0  0  0  0  0  0  0
    1.2283    0.8416   -1.6975 C   0  0  0  0  0  0  0  0  0  0  0  0
    1.6776   -0.1343   -2.8997 C   0  0  0  0  0  0  0  0  0  0  0  0
    0.2975   -0.8699   -2.3831 C   0  0  0  0  0  0  0  0  0  0  0  0
    0.1545   -0.6293   -0.8766 C   0  0  0  0  0  0  0  0  0  0  0  0
   -0.6175    0.3994   -0.0075 C   0  0  0  0  0  0  0  0  0  0  0  0
    1.4406    2.0122   -0.0484 O   0  0  0  0  0  0  0  0  0  0  0  0
   -0.5723    3.1694   -0.3174 C   0  0  0  0  0  0  0  0  0  0  0  0
    0.6590    4.0138   -0.6886 C   0  0  0  0  0  0  0  0  0  0  0  0
   -1.3522    3.8095    0.8240 C   0  0  0  0  0  0  0  0  0  0  0  0
   -0.6416    4.3867    2.0178 C   0  0  0  0  0  0  0  0  0  0  0  0
    0.3456    5.4081    1.4392 C   0  0  0  0  0  0  0  0  0  0  0  0
    1.3157    4.6402    0.5498 C   0  0  0  0  0  0  0  0  0  0  0  0
   -2.6643    3.8539    0.7509 C   0  0  0  0  0  0  0  0  0  0  0  0
   -0.0688    1.9517    1.1651 H   0  0  0  0  0  0  0  0  0  0  0  0
   -1.3492    3.1034   -1.0892 H   0  0  0  0  0  0  0  0  0  0  0  0
    0.4642    4.7663   -1.4651 H   0  0  0  0  0  0  0  0  0  0  0  0
    2.7431    3.3183   -1.2311 H   0  0  0  0  0  0  0  0  0  0  0  0
   -0.3098    2.5862   -2.9863 C   0  0  0  0  0  0  0  0  0  0  0  0
    2.4219    5.5991    0.0938 C   0  0  0  0  0  0  0  0  0  0  0  0
    1.7939    6.8071   -0.6041 C   0  0  0  0  0  0  0  0  0  0  0  0
    3.2209    6.0713    1.3102 C   0  0  0  0  0  0  0  0  0  0  0  0
    1.3838   -0.9217   -0.2180 O   0  0  0  0  0  0  0  0  0  0  0  0
   -0.6429   -1.9233   -0.4780 C   0  0  0  0  0  0  0  0  0  0  0  0
    2.0291    2.3760   -3.5133 O   0  0  0  0  0  0  0  0  0  0  0  0
    2.4041    3.5847   -3.9608 C   0  0  0  0  0  0  0  0  0  0  0  0
    1.9437    4.5836   -3.4607 O   0  0  0  0  0  0  0  0  0  0  0  0
    3.3995    3.6958   -5.0868 C   0  0  0  0  0  0  0  0  0  0  0  0
    3.6516    5.1718   -5.4008 C   0  0  0  0  0  0  0  0  0  0  0  0
    4.6622    5.2846   -6.5440 C   0  0  0  0  0  0  0  0  0  0  0  0
   -0.8541   -0.4071   -3.1363 O   0  0  0  0  0  0  0  0  0  0  0  0
   -0.5036   -2.0410   -4.5823 O   0  0  0  0  0  0  0  0  0  0  0  0
   -1.1687   -1.0890   -4.2489 C   0  0  0  0  0  0  0  0  0  0  0  0
   -2.3513   -0.6670   -5.0822 C   0  0  0  0  0  0  0  0  0  0  0  0
   -0.6926   -0.1184    1.3525 O   0  0  0  0  0  0  0  0  0  0  0  0
   -1.7702    0.2235    2.0761 C   0  0  0  0  0  0  0  0  0  0  0  0
   -2.6227    0.9304    1.5932 O   0  0  0  0  0  0  0  0  0  0  0  0
   -1.9166   -0.2745    3.4909 C   0  0  0  0  0  0  0  0  0  0  0  0
   -3.2225    0.2564    4.0858 C   0  0  0  0  0  0  0  0  0  0  0  0
   -3.3712   -0.2492    5.5222 C   0  0  0  0  0  0  0  0  0  0  0  0
  2  3  1  0      
  3  4  1  0      
  4  5  1  0      
  5  6  1  0      
  6  7  1  0      
  7  8  1  0      
  8  1  1  0      
  1  9  1  0      
  2  9  1  0      
 10 11  1  0      
  1 10  1  0      
  2 11  1  0      
 10 12  1  0      
 12 13  1  0      
 13 14  1  0      
 14 15  1  0      
 15 11  1  0      
 12 16  2  0      
  1 17  1  0      
 10 18  1  0      
 11 19  1  0      
  2 20  1  0      
  3 21  1  0      
 22 23  1  0      
 22 24  1  0      
 15 22  1  0      
  7 25  1  0      
  7 26  1  0      
  3 27  1  0      
 27 28  1  0      
 28 29  2  0      
 28 30  1  0      
 30 31  1  0      
 31 32  1  0      
  6 33  1  0      
 33 35  1  0      
 34 35  2  0      
 35 36  1  0      
  8 37  1  0      
 37 38  1  0      
 38 39  2  0      
 38 40  1  0      
 40 41  1  0      
 41 42  1  0      
M  STY  1   1 SUP
M  SLB  1   1   1
M  SAL   1  6  27  28  29  30  31  32
M  SBL   1  1  29
M  SMT   1 OCO(CH2)2CH3
M  SBV   1 29   -4.4405    3.2768
M  STY  1   2 SUP
M  SLB  1   2   2
M  SAL   2  4  33  34  35  36
M  SBL   2  1  35
M  SMT   2 OAc
M  SBV   2 35   -7.2995    5.3404
M  STY  1   3 SUP
M  SLB  1   3   3
M  SAL   3  6  37  38  39  40  41  42
M  SBL   3  1  39
M  SMT   3 OCO(CH2)2CH3
M  SBV   3 39   -5.1257    6.8403
M  END
$$$$
