# Supplementary material for: Cytotoxic and Anti-Inflammatory Eunicellin-Based Diterpenoids from the Soft Coral Cladiella krempfi
Source: MDPI journal article supplement (doi:10.3390/md11030788), 2013-03-12
Supplement: s8 [file s8]

marinedrugs-11-00788-s004.mol
  ChemDraw04161417012D

 42 44  0  0  0  0  0  0  0  0999 V2000
   -0.3365    0.5186    0.0000 C   0  0  0  0  0  0  0  0  0  0  0  0
   -0.3365   -0.5332    0.0000 C   0  0  0  0  0  0  0  0  0  0  0  0
    0.2410   -0.9928    0.0000 C   0  0  0  0  0  0  0  0  0  0  0  0
    1.0660   -0.9928    0.0000 C   0  0  0  0  0  0  0  0  0  0  0  0
    1.6435   -0.5126    0.0000 C   0  0  0  0  0  0  0  0  0  0  0  0
    1.6435    0.4155    0.0000 C   0  0  0  0  0  0  0  0  0  0  0  0
    1.0660    0.9989    0.0000 C   0  0  0  0  0  0  0  0  0  0  0  0
    0.2410    0.9989    0.0000 C   0  0  0  0  0  0  0  0  0  0  0  0
    0.0347   -0.0176    0.0000 O   0  0  0  0  0  0  0  0  0  0  0  0
   -0.9553    0.3949    0.0000 C   0  0  0  0  0  0  0  0  0  0  0  0
   -0.9553   -0.4301    0.0000 C   0  0  0  0  0  0  0  0  0  0  0  0
   -1.6697    0.8074    0.0000 C   0  0  0  0  0  0  0  0  0  0  0  0
   -2.3842    0.3949    0.0000 C   0  0  0  0  0  0  0  0  0  0  0  0
   -2.3842   -0.4301    0.0000 C   0  0  0  0  0  0  0  0  0  0  0  0
   -1.6697   -0.8426    0.0000 C   0  0  0  0  0  0  0  0  0  0  0  0
   -1.6697    1.6324    0.0000 C   0  0  0  0  0  0  0  0  0  0  0  0
   -0.7490    1.2331    0.0000 H   0  0  0  0  0  0  0  0  0  0  0  0
   -0.9553    1.2199    0.0000 H   0  0  0  0  0  0  0  0  0  0  0  0
   -0.9553   -1.2551    0.0000 H   0  0  0  0  0  0  0  0  0  0  0  0
   -0.5500   -1.3301    0.0000 H   0  0  0  0  0  0  0  0  0  0  0  0
   -0.1715   -1.7073    0.0000 C   0  0  0  0  0  0  0  0  0  0  0  0
   -1.6697   -1.6676    0.0000 C   0  0  0  0  0  0  0  0  0  0  0  0
   -2.3842   -2.0801    0.0000 C   0  0  0  0  0  0  0  0  0  0  0  0
   -0.9553   -2.0801    0.0000 C   0  0  0  0  0  0  0  0  0  0  0  0
    1.8628    0.7853    0.0000 O   0  0  0  0  0  0  0  0  0  0  0  0
    1.4785    1.7133    0.0000 C   0  0  0  0  0  0  0  0  0  0  0  0
    2.3842   -3.4677    0.0000 O   0  0  0  0  0  0  0  0  0  0  0  0
    1.6698   -3.0552    0.0000 C   0  0  0  0  0  0  0  0  0  0  0  0
    1.6698   -2.2302    0.0000 O   0  0  0  0  0  0  0  0  0  0  0  0
    0.9553   -3.4677    0.0000 C   0  0  0  0  0  0  0  0  0  0  0  0
    0.2408   -3.0552    0.0000 C   0  0  0  0  0  0  0  0  0  0  0  0
   -0.4736   -3.4677    0.0000 C   0  0  0  0  0  0  0  0  0  0  0  0
    0.9278    0.0042    0.0000 O   0  0  0  0  0  0  0  0  0  0  0  0
    0.2133    1.2417    0.0000 O   0  0  0  0  0  0  0  0  0  0  0  0
    0.2133    0.4167    0.0000 C   0  0  0  0  0  0  0  0  0  0  0  0
   -0.5011    0.0042    0.0000 C   0  0  0  0  0  0  0  0  0  0  0  0
    1.6991    2.0875    0.0000 O   0  0  0  0  0  0  0  0  0  0  0  0
    1.1158    2.6708    0.0000 C   0  0  0  0  0  0  0  0  0  0  0  0
    1.3293    3.4677    0.0000 O   0  0  0  0  0  0  0  0  0  0  0  0
    0.3189    2.4573    0.0000 C   0  0  0  0  0  0  0  0  0  0  0  0
   -0.2645    3.0407    0.0000 C   0  0  0  0  0  0  0  0  0  0  0  0
   -1.0614    2.8271    0.0000 C   0  0  0  0  0  0  0  0  0  0  0  0
  2  3  1  0      
  3  4  1  0      
  4  5  1  0      
  5  6  1  0      
  6  7  1  0      
  7  8  1  0      
  8  1  1  0      
  1  9  1  0      
  2  9  1  0      
 10 11  1  0      
  1 10  1  0      
  2 11  1  0      
 10 12  1  0      
 12 13  1  0      
 13 14  1  0      
 14 15  1  0      
 15 11  1  0      
 12 16  2  0      
  1 17  1  6      
 10 18  1  1      
 11 19  1  1      
  2 20  1  6      
  3 21  1  6      
 22 23  1  0      
 22 24  1  0      
 15 22  1  1      
  7 25  1  6      
  7 26  1  0      
  3 27  1  0      
 27 28  1  0      
 28 29  2  0      
 28 30  1  0      
 30 31  1  0      
 31 32  1  0      
  6 33  1  1      
 33 35  1  0      
 34 35  2  0      
 35 36  1  0      
  8 37  1  6      
 37 38  1  0      
 38 39  2  0      
 38 40  1  0      
 40 41  1  0      
 41 42  1  0      
M  STY  1   1 SUP
M  SLB  1   1   1
M  SAL   1  6  27  28  29  30  31  32
M  SBL   1  1  29
M  SMT   1 OCO(CH2)2CH3
M  SBV   1 29   -4.4405    3.2768
M  STY  1   2 SUP
M  SLB  1   2   2
M  SAL   2  4  33  34  35  36
M  SBL   2  1  35
M  SMT   2 OAc
M  SBV   2 35   -7.2995    5.3404
M  STY  1   3 SUP
M  SLB  1   3   3
M  SAL   3  6  37  38  39  40  41  42
M  SBL   3  1  39
M  SMT   3 OCO(CH2)2CH3
M  SBV   3 39   -5.1257    6.8403
M  END
