# Supplementary material for: Cytotoxic and Anti-Inflammatory Eunicellin-Based Diterpenoids from the Soft Coral Cladiella krempfi
Source: MDPI journal article supplement (doi:10.3390/md11030788), 2013-03-12
Supplement: s10 [file s10]

marinedrugs-11-00788-s005.mol
  ChemDraw03251423492D

 37 39  0  0  0  0  0  0  0  0999 V2000
    0.1717    1.1344    0.0000 C   0  0  0  0  0  0  0  0  0  0  0  0
    0.1717    0.0825    0.0000 C   0  0  0  0  0  0  0  0  0  0  0  0
    0.7492   -0.3771    0.0000 C   0  0  0  0  0  0  0  0  0  0  0  0
    1.5742   -0.3771    0.0000 C   0  0  0  0  0  0  0  0  0  0  0  0
    2.1517    0.1031    0.0000 C   0  0  0  0  0  0  0  0  0  0  0  0
    2.1517    1.0312    0.0000 C   0  0  0  0  0  0  0  0  0  0  0  0
    1.5742    1.6146    0.0000 C   0  0  0  0  0  0  0  0  0  0  0  0
    0.7492    1.6146    0.0000 C   0  0  0  0  0  0  0  0  0  0  0  0
    0.5430    0.5981    0.0000 O   0  0  0  0  0  0  0  0  0  0  0  0
   -0.4470    1.0106    0.0000 C   0  0  0  0  0  0  0  0  0  0  0  0
   -0.4470    0.1856    0.0000 C   0  0  0  0  0  0  0  0  0  0  0  0
   -1.1615    1.4231    0.0000 C   0  0  0  0  0  0  0  0  0  0  0  0
   -1.8760    1.0106    0.0000 C   0  0  0  0  0  0  0  0  0  0  0  0
   -1.8760    0.1856    0.0000 C   0  0  0  0  0  0  0  0  0  0  0  0
   -1.1615   -0.2269    0.0000 C   0  0  0  0  0  0  0  0  0  0  0  0
   -1.1615    2.2481    0.0000 C   0  0  0  0  0  0  0  0  0  0  0  0
   -0.2408    1.8488    0.0000 H   0  0  0  0  0  0  0  0  0  0  0  0
   -0.4470    1.8356    0.0000 H   0  0  0  0  0  0  0  0  0  0  0  0
   -0.4470   -0.6394    0.0000 H   0  0  0  0  0  0  0  0  0  0  0  0
   -0.0418   -0.7144    0.0000 H   0  0  0  0  0  0  0  0  0  0  0  0
    0.3367   -1.0916    0.0000 C   0  0  0  0  0  0  0  0  0  0  0  0
    2.8662    1.4437    0.0000 O   0  0  0  0  0  0  0  0  0  0  0  0
    1.1617   -1.0916    0.0000 O   0  0  0  0  0  0  0  0  0  0  0  0
    1.8762   -1.5041    0.0000 C   0  0  0  0  0  0  0  0  0  0  0  0
    2.5907   -1.0916    0.0000 C   0  0  0  0  0  0  0  0  0  0  0  0
    3.3051   -1.5041    0.0000 C   0  0  0  0  0  0  0  0  0  0  0  0
    4.0196   -1.0916    0.0000 C   0  0  0  0  0  0  0  0  0  0  0  0
    1.8762   -2.3291    0.0000 O   0  0  0  0  0  0  0  0  0  0  0  0
   -1.1615   -1.0519    0.0000 C   0  0  0  0  0  0  0  0  0  0  0  0
   -1.8760   -1.4644    0.0000 C   0  0  0  0  0  0  0  0  0  0  0  0
   -0.4470   -1.4644    0.0000 C   0  0  0  0  0  0  0  0  0  0  0  0
    2.2887    2.0271    0.0000 C   0  0  0  0  0  0  0  0  0  0  0  0
    1.1617    2.3291    0.0000 O   0  0  0  0  0  0  0  0  0  0  0  0
   -2.5907    1.0106    0.0000 O   0  0  0  0  0  0  0  0  0  0  0  0
   -3.3051    2.2481    0.0000 O   0  0  0  0  0  0  0  0  0  0  0  0
   -3.3051    1.4231    0.0000 C   0  0  0  0  0  0  0  0  0  0  0  0
   -4.0196    1.0106    0.0000 C   0  0  0  0  0  0  0  0  0  0  0  0
  2  3  1  0      
  3  4  1  0      
  4  5  1  0      
  5  6  1  0      
  6  7  1  0      
  7  8  1  0      
  8  1  1  0      
  1  9  1  0      
  2  9  1  0      
 10 11  1  0      
  1 10  1  0      
  2 11  1  0      
 10 12  1  0      
 12 13  1  0      
 13 14  1  0      
 14 15  1  0      
 15 11  1  0      
 12 16  2  0      
  1 17  1  6      
 10 18  1  1      
 11 19  1  1      
  2 20  1  6      
  3 21  1  6      
  6 22  1  1      
  3 23  1  0      
 23 24  1  0      
 24 25  1  0      
 25 26  1  0      
 26 27  1  0      
 24 28  2  0      
 15 29  1  1      
 29 30  1  0      
 29 31  1  0      
  7 32  1  6      
  7 33  1  0      
 13 34  1  6      
 34 36  1  0      
 35 36  2  0      
 36 37  1  0      
M  STY  1   1 SUP
M  SLB  1   1   1
M  SAL   1  4  34  35  36  37
M  SBL   1  1  36
M  SMT   1 OAc
M  SBV   1 36   -7.4111    5.6306
M  END
