# Supplementary material for: Cytotoxic and Anti-Inflammatory Eunicellin-Based Diterpenoids from the Soft Coral Cladiella krempfi
Source: MDPI journal article supplement (doi:10.3390/md11030788), 2013-03-12
Supplement: s11 [file s11]

marinedrugs-11-00788-s006.mol
  corina  04161405073D 1   1.00000     0.00000 
CORINA 3.49 0023  12.04.2013
 30 32  0  0  0  0  0  0  0  0999 V2000
    0.1908    1.0546   -0.1820 C   0  0  0  0  0  0  0  0  0  0  0  0
    0.6637    2.9739   -1.1880 C   0  0  0  0  0  0  0  0  0  0  0  0
    0.3200    1.8299   -2.2802 C   0  0  0  0  0  0  0  0  0  0  0  0
    1.5542    0.9495   -1.8397 C   0  0  0  0  0  0  0  0  0  0  0  0
    2.2964    0.4068   -3.1496 C   0  0  0  0  0  0  0  0  0  0  0  0
    1.4199   -0.8663   -2.9667 C   0  0  0  0  0  0  0  0  0  0  0  0
    1.1941   -0.9603   -1.4750 C   0  0  0  0  0  0  0  0  0  0  0  0
    0.1890   -0.4498   -0.4962 C   0  0  0  0  0  0  0  0  0  0  0  0
    1.2505    1.9991   -0.2182 O   0  0  0  0  0  0  0  0  0  0  0  0
   -1.0891    1.8325   -0.0043 C   0  0  0  0  0  0  0  0  0  0  0  0
   -0.6982    3.2200   -0.5061 C   0  0  0  0  0  0  0  0  0  0  0  0
   -1.6530    1.8181    1.3964 C   0  0  0  0  0  0  0  0  0  0  0  0
   -1.1070    2.7501    2.4513 C   0  0  0  0  0  0  0  0  0  0  0  0
   -1.2342    4.1472    1.8291 C   0  0  0  0  0  0  0  0  0  0  0  0
   -0.3034    4.1813    0.6235 C   0  0  0  0  0  0  0  0  0  0  0  0
   -2.6309    0.9902    1.7000 C   0  0  0  0  0  0  0  0  0  0  0  0
    0.3038    0.9018    0.8909 H   0  0  0  0  0  0  0  0  0  0  0  0
   -1.9133    1.4096   -0.6243 H   0  0  0  0  0  0  0  0  0  0  0  0
   -1.4501    3.6788   -1.1811 H   0  0  0  0  0  0  0  0  0  0  0  0
    1.2704    3.8323   -1.5164 H   0  0  0  0  0  0  0  0  0  0  0  0
    0.5194    2.4885   -3.6749 C   0  0  0  0  0  0  0  0  0  0  0  0
   -0.2621    5.6079    0.0655 C   0  0  0  0  0  0  0  0  0  0  0  0
   -1.6867    6.0821   -0.2283 C   0  0  0  0  0  0  0  0  0  0  0  0
    0.1916   -0.7743   -3.6835 O   0  0  0  0  0  0  0  0  0  0  0  0
    0.3836    6.5391    1.0935 C   0  0  0  0  0  0  0  0  0  0  0  0
    2.0701   -1.7738   -0.8885 C   0  0  0  0  0  0  0  0  0  0  0  0
   -0.9509    1.1893   -2.2818 O   0  0  0  0  0  0  0  0  0  0  0  0
   -1.8568    3.0902   -2.9520 O   0  0  0  0  0  0  0  0  0  0  0  0
   -2.0133    1.9438   -2.6037 C   0  0  0  0  0  0  0  0  0  0  0  0
   -3.4012    1.3612   -2.5308 C   0  0  0  0  0  0  0  0  0  0  0  0
  2  3  1  0      
  3  4  1  0      
  4  5  1  0      
  5  6  1  0      
  6  7  1  0      
  7  8  1  0      
  8  1  1  0      
  1  9  1  0      
  2  9  1  0      
 10 11  1  0      
  1 10  1  0      
  2 11  1  0      
 10 12  1  0      
 12 13  1  0      
 13 14  1  0      
 14 15  1  0      
 15 11  1  0      
 12 16  2  0      
  1 17  1  0      
 10 18  1  0      
 11 19  1  0      
  2 20  1  0      
  3 21  1  0      
 22 23  1  0      
 22 25  1  0      
 15 22  1  0      
  6 24  1  0      
  7 26  2  0      
  3 27  1  0      
 27 29  1  0      
 28 29  2  0      
 29 30  1  0      
M  STY  1   1 SUP
M  SLB  1   1   1
M  SAL   1  4  27  28  29  30
M  SBL   1  1  29
M  SMT   1 OAc
M  SBV   1 29   -7.4869    5.0073
M  END
$$$$
