# Supplementary material for: Cytotoxic and Anti-Inflammatory Eunicellin-Based Diterpenoids from the Soft Coral Cladiella krempfi
Source: MDPI journal article supplement (doi:10.3390/md11030788), 2013-03-12
Supplement: s12 [file s12]

marinedrugs-11-00788-s006.mol
  ChemDraw03251423492D

 30 32  0  0  0  0  0  0  0  0999 V2000
   -0.3234    0.6608    0.0000 C   0  0  0  0  0  0  0  0  0  0  0  0
   -0.3234   -0.3911    0.0000 C   0  0  0  0  0  0  0  0  0  0  0  0
    0.2541   -0.8507    0.0000 C   0  0  0  0  0  0  0  0  0  0  0  0
    1.0791   -0.8507    0.0000 C   0  0  0  0  0  0  0  0  0  0  0  0
    1.6566   -0.3704    0.0000 C   0  0  0  0  0  0  0  0  0  0  0  0
    1.6566    0.5577    0.0000 C   0  0  0  0  0  0  0  0  0  0  0  0
    1.0791    1.1410    0.0000 C   0  0  0  0  0  0  0  0  0  0  0  0
    0.2541    1.1410    0.0000 C   0  0  0  0  0  0  0  0  0  0  0  0
    0.0479    0.1246    0.0000 O   0  0  0  0  0  0  0  0  0  0  0  0
   -0.9421    0.5371    0.0000 C   0  0  0  0  0  0  0  0  0  0  0  0
   -0.9421   -0.2879    0.0000 C   0  0  0  0  0  0  0  0  0  0  0  0
   -1.6566    0.9496    0.0000 C   0  0  0  0  0  0  0  0  0  0  0  0
   -2.3711    0.5371    0.0000 C   0  0  0  0  0  0  0  0  0  0  0  0
   -2.3711   -0.2879    0.0000 C   0  0  0  0  0  0  0  0  0  0  0  0
   -1.6566   -0.7004    0.0000 C   0  0  0  0  0  0  0  0  0  0  0  0
   -1.6566    1.7746    0.0000 C   0  0  0  0  0  0  0  0  0  0  0  0
   -0.7359    1.3753    0.0000 H   0  0  0  0  0  0  0  0  0  0  0  0
   -0.9421    1.3621    0.0000 H   0  0  0  0  0  0  0  0  0  0  0  0
   -0.9421   -1.1129    0.0000 H   0  0  0  0  0  0  0  0  0  0  0  0
   -0.5369   -1.1880    0.0000 H   0  0  0  0  0  0  0  0  0  0  0  0
   -0.1584   -1.5651    0.0000 C   0  0  0  0  0  0  0  0  0  0  0  0
   -1.6566   -1.5254    0.0000 C   0  0  0  0  0  0  0  0  0  0  0  0
   -2.3711   -1.9379    0.0000 C   0  0  0  0  0  0  0  0  0  0  0  0
    2.3711    0.9702    0.0000 O   0  0  0  0  0  0  0  0  0  0  0  0
   -0.9421   -1.9379    0.0000 C   0  0  0  0  0  0  0  0  0  0  0  0
    1.2926    1.9379    0.0000 C   0  0  0  0  0  0  0  0  0  0  0  0
    0.1031   -1.4130    0.0000 O   0  0  0  0  0  0  0  0  0  0  0  0
   -0.6113   -0.1755    0.0000 O   0  0  0  0  0  0  0  0  0  0  0  0
   -0.6113   -1.0005    0.0000 C   0  0  0  0  0  0  0  0  0  0  0  0
   -1.3258   -1.4130    0.0000 C   0  0  0  0  0  0  0  0  0  0  0  0
  2  3  1  0      
  3  4  1  0      
  4  5  1  0      
  5  6  1  0      
  6  7  1  0      
  7  8  1  0      
  8  1  1  0      
  1  9  1  0      
  2  9  1  0      
 10 11  1  0      
  1 10  1  0      
  2 11  1  0      
 10 12  1  0      
 12 13  1  0      
 13 14  1  0      
 14 15  1  0      
 15 11  1  0      
 12 16  2  0      
  1 17  1  6      
 10 18  1  1      
 11 19  1  1      
  2 20  1  6      
  3 21  1  6      
 22 23  1  0      
 22 25  1  0      
 15 22  1  1      
  6 24  1  1      
  7 26  2  0      
  3 27  1  0      
 27 29  1  0      
 28 29  2  0      
 29 30  1  0      
M  STY  1   1 SUP
M  SLB  1   1   1
M  SAL   1  4  27  28  29  30
M  SBL   1  1  29
M  SMT   1 OAc
M  SBV   1 29   -7.4869    5.0073
M  END
